# Supplementary material
Source: ML conference proceedings conference paper supplement (https://openreview.net/forum?id=BxZuD_Uiql5)
Supplement: supplementary_material [file attachment]

$\Lambda$

$v_1$

,

$v_1$

$=$

$1$

$1$

$1$

$1$
