# Supplementary material
Source: ML conference proceedings conference paper supplement (https://openreview.net/forum?id=BxZuD_Uiql5)
Supplement: supplementary_material [file attachment]

$$\Lambda v_1, v_2 = 1$$
